# Supplementary material for: In situ synthesis and biocompatibility of nano hydroxyapatite on pristine and chitosan functionalized graphene oxide
Source: Royal Society of Chemistry journal article supplement (doi:10.1039/c2tb00053a), 2012-11-06
Supplement: c2tb00053a.pdf [file c2tb00053a.pdf]

## Supporting Information for

### *In situ Synthesis and Biocompatibility of Nano Hydroxyapatite on Pristine and Chitosan Functionalized Graphene Oxide*

Ming Li<sup>a</sup>, Yanbo Wang<sup>b</sup>, Qian Liu<sup>a</sup>, Qihong Li<sup>a</sup>, Yan Cheng<sup>a\*</sup>, Yufeng Zheng<sup>a,c</sup>,  
Tingfei Xi<sup>a</sup>, Shicheng Wei<sup>a,d</sup>

<sup>a</sup>Center for Biomedical Materials and Tissue Engineering, Academy for Advanced Interdisciplinary Studies, Peking University, Beijing 100871, China

<sup>b</sup>Angstrom Materials, LLC, 1240 McCook Ave., Dayton, OH 45404, USA

<sup>c</sup>Department of Advanced Materials and Nanotechnology, College of Engineering, Peking University, Beijing 100871, China

<sup>d</sup>Department of Oral and Maxillofacial Surgery, School of Stomatology, Peking University, Beijing 100871, People's Republic of China

#### The SEM and AFM analysis of GO sheets

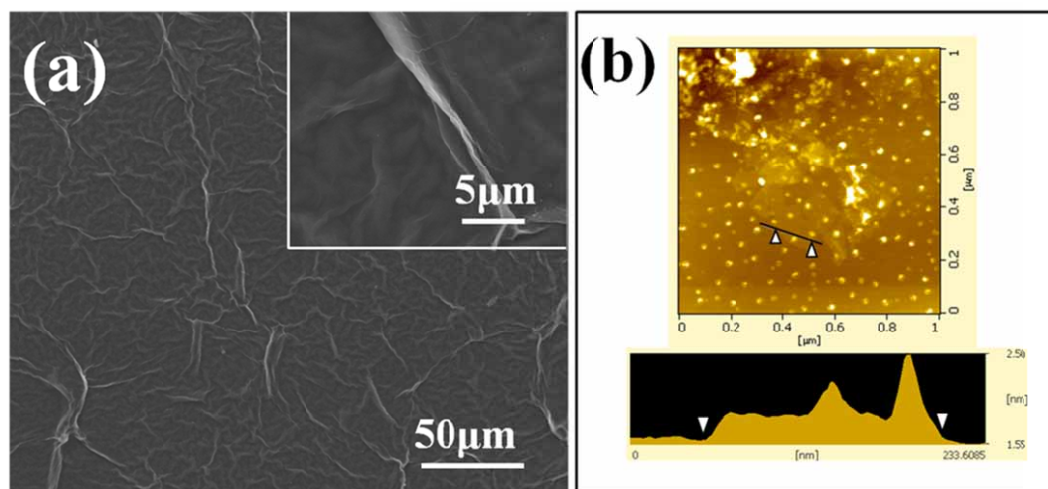

**Figure S1.** SEM image (a) of GO sheets. The AFM image and sectional analysis (b) of GO sheets.

As an intrinsic property of graphene oxide sheets, folds and scrolls can be observed at the GO surface in Fig.S1(a). The AFM analysis indicates that the GO sheets are highly exfoliated with sheet thickness less than 1 nm<sup>1</sup>. The observed particles may result from the small amount of impurities and inadequate exfoliated GO stacks.

#### TEM images and EDX analysis of the nanocomposites

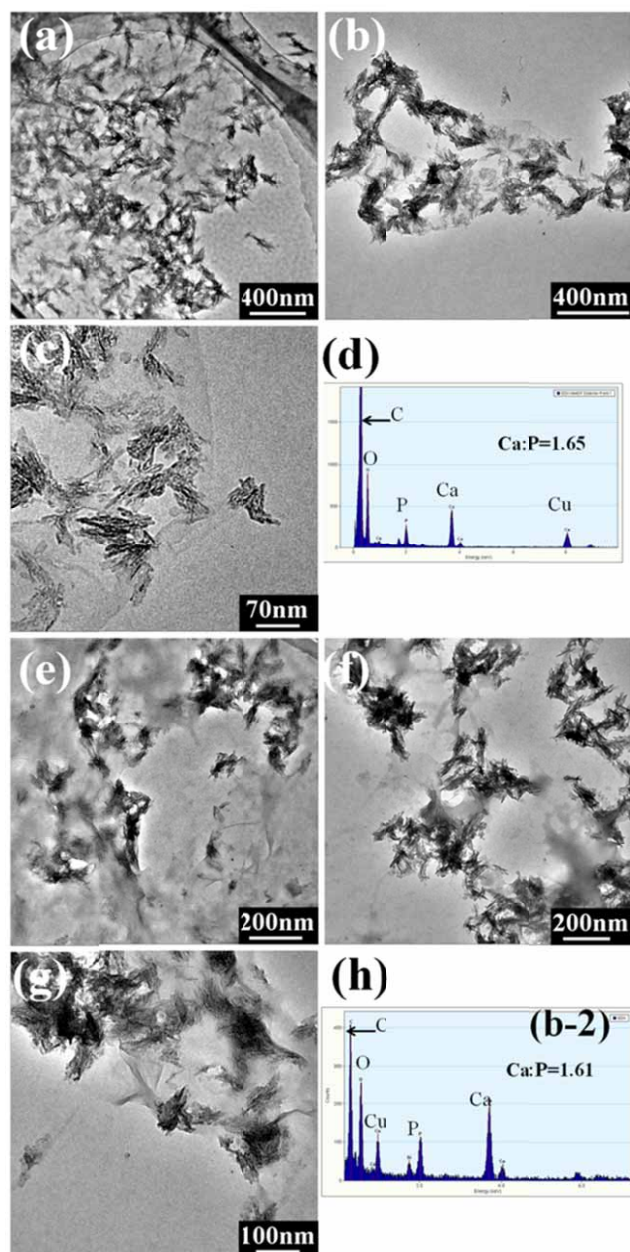

**Figure S2.** TEM images of GO/HA (a, b and c) and CS-GO/HA (e, f and g). The EDX spectra of GO/HA (d) and CS-GO/HA (h).

### FTIR analysis of the nanocomposites

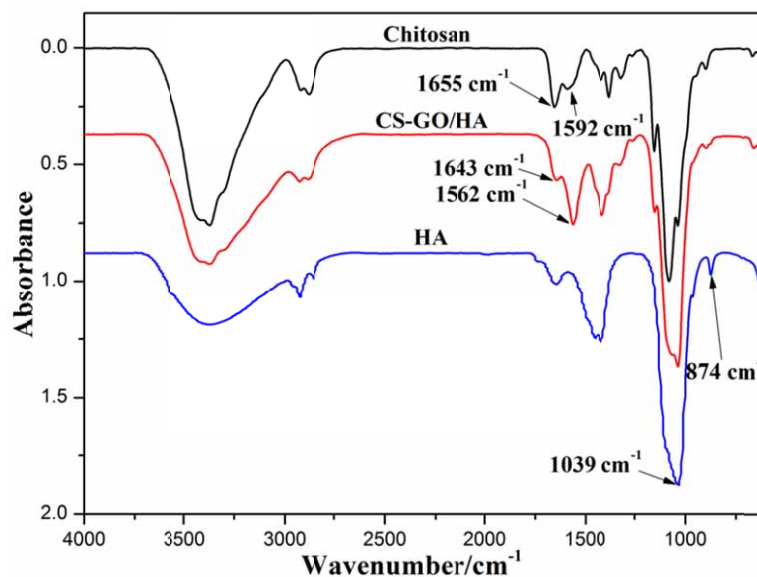

**Figure S3.** The FTIR spectra of Chitosan and CS-GO/HA composites

The formation of HA on GO surface (GO/HA) is further identified by the stretching band of phosphate at around  $1039\text{ cm}^{-1}$  and the stretching band of carbonate/acid phosphate groups at about  $874\text{ cm}^{-1}$ , which can be also observed in the case of CS-GO/HA.

The two characteristic absorbance bands in the spectrum of pure CS at  $1655\text{ cm}^{-1}$  and  $1592\text{ cm}^{-1}$  are assigned to the C=O stretching vibration of -NHCO- and the N-H bending of -NH<sub>2</sub>, respectively. However, these two peaks of the CS-GO/HA are shifted to a lower wave number (from  $1655\text{ cm}^{-1}$  to  $1643\text{ cm}^{-1}$  and  $1592\text{ cm}^{-1}$  to  $1562\text{ cm}^{-1}$ , respectively), probably due to the synergistic effect of hydrogen bonding between CS and the oxygenated groups in GO.<sup>2</sup>

### XPS analysis of the composites

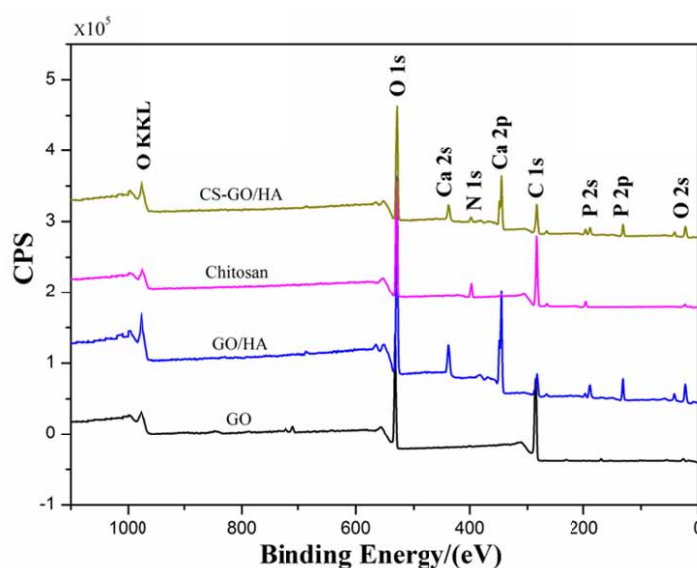

**Figure S4.** The survey XPS spectra of GO, chitosan, GO/HA and CS-GO/HA nanocomposites

**Table S1.** The elemental composition of GO, GO/HA, CS and CS-GO/HA determined by XPS analysis

|          | C      | O      | Ca     | P      | N     | Ca:P |
|----------|--------|--------|--------|--------|-------|------|
| GO       | 72.20% | 27.80% | 0      | 0      | 0     |      |
| GO/HA    | 22.20% | 47.80% | 17.90% | 12.10% | 0     | 1.48 |
| CS       | 64.46% | 28.96  | 0      | 0      | 6.58  |      |
| CS-GO/HA | 35.50% | 40.50% | 12.60% | 9.10%  | 2.40% | 1.38 |

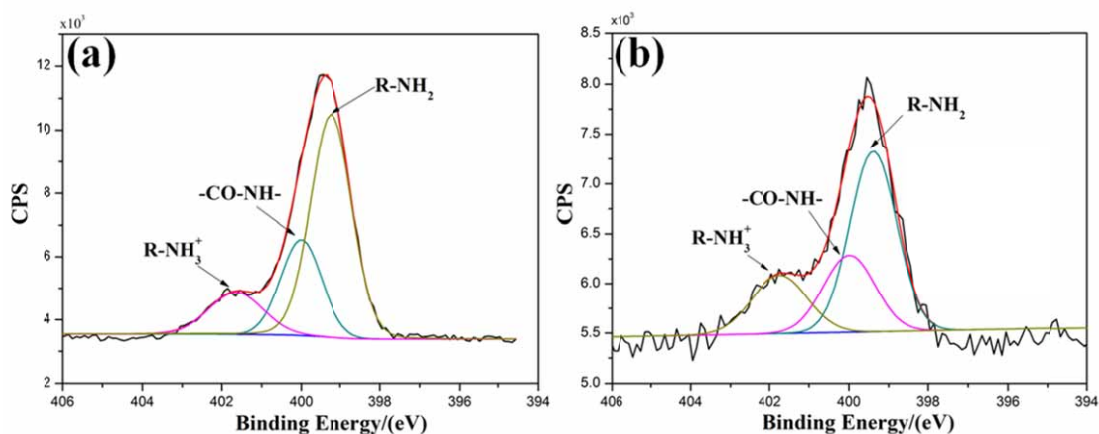

**Figure S5.** The high resolution XPS spectra of N 1s of Chitosan(a) and CS-GO/HA(b) nanocomposites

**Table S2.** The elemental composition of chitosan and CS-GO/HA determined by XPS analysis

|          | R-NH <sub>3</sub> <sup>+</sup> | -CO-NH- | R-NH <sub>2</sub> |
|----------|--------------------------------|---------|-------------------|
| CS       | 14.3%                          | 24.8%   | 60.8%             |
| CS-GO/HA | 20.8%                          | 25.4%   | 53.8%             |

By fitting the distribution of N1s in Fig.S5 using Gaussian/ Lorentz curve, three peaks were obtained for both of them. The peaks centered at 399.4 eV, 400.5 eV, and 401.7 eV are consistent with amine (R-NH<sub>3</sub><sup>+</sup>), amide (CO-NH-), and the protonated amine species (R-NH<sub>2</sub>), respectively<sup>2-3</sup>. The quantitative fitting results in Table S2 indicate that the content of R-NH<sub>3</sub><sup>+</sup> component in the total of N1s line increased from 14.3% in CS to 20.8% in CS-GO/HA, which can be ascribed to the formation of electrostatic interaction between the negative charge on the surface of GO and N groups of CS<sup>2</sup>.

1. H. Tang, G. J. Ehlert, Y. Lin and H. Sodano, *Nano Lett.*, 2012, **12**, 84-90.
2. X. M. Yang, Y. F. Tu, L. A. Li, S. M. Shang and X. M. Tao, *ACS.Appl.Mater.Inter.*, 2010, **2**, 1707-1713.
3. G. Ke, W. Guan, C. Tang, D. Zeng and F. Deng, *Biomacromolecules*, 2007, **8**, 322-326.
